# Supplementary material for: A Computationally Optimised Structural Integrity Sequence Enhances Vaccine Stability, Yield and Safety Profile
Source: Research Square preprint supplement (doi:10.21203/rs.3.rs-7642777/v1), 2025-09-30
Supplement: Supplementary file 1 [file 813f9c8f0bc8cc2de88a017e.pdf]

**Supplementary Information for “A Computationally Optimised Structural Integrity Sequence Enhances Vaccine Stability, Yield and Safety Profile”**

Arthur Sarron, Sun B. Sowers, Yaroslav Tsybovsky, Stephen N. Crooke, Guillaume B. E. Stewart-Jones, Ian M. Overton

**Table of contents**

Supplementary Figure S1 ..... 2

Supplementary Figure S2 ..... 2

Supplementary Figure S3 ..... 3

Supplementary Figure S4 ..... 4

Supplementary Figure S5 ..... 5

Supplementary Table S1 (SupplementaryTable\_S1.xls) as well as the homology models for GCN4\_QM (SupplementaryData\_S1.pdb), GCN4\_init (SupplementaryData\_S2.pdb) are available a separate supplementary files.

The Kmer\_finder software is available from Github at <https://github.com/overton-group/KmerFinder>

Please note, reference numbering in the Figure Legends below refers to the main manuscript.

GCN4\_init: IEDKIEEILSKIYHIENEIARIKKLIGEAP

**Supplementary Figure S1. GCN4\_init trimerisation region.** The sequence above was taken from the PDB record 2B9B, where it was introduced in order to stabilise the parainfluenza virus Fusion (F) protein trimer in the prefusion conformation [21].

```
JUNB
# Matrix: EBLOSUM62
# Gap_penalty: 14
# Extend_penalty: 4
#
# Length: 8
# Identity: 7/8 (87.5%)
# Similarity: 8/8 (100.0%)
# Gaps: 0/8 ( 0.0%)
# Score: 41
Query 42 GSGGGSGG 49
      |||||:|
JUNB 116 GSGGGAGG 123
```

---

**Supplementary Figure S2. Example PSIBLAST result, aligning to JUNB.** The alignment length, score, percentage identity, percentage similarity, query (GCN4\_init) and subject (JUNB) sequences are shown.

```
# NetMHCpan version 4.1b

# Tmpdir made /var/www/html/services/NetMHCpan-4.1/tmp/netMHCpan9gEUpN
# Input is in PEPTIDE format

# Make EL predictions

HLA-B18:01 : Distance to training data 0.000 (using nearest neighbor HLA-B18:01)

# Rank Threshold for Strong binding peptides 0.500
# Rank Threshold for Weak binding peptides 2.000
```

| Pos | MHC         | Peptide   | Core      | Of | Gp | Gl | Ip | Il | Icore     | Identity | Score_EL  | %Rank_EL | BindLevel |
|-----|-------------|-----------|-----------|----|----|----|----|----|-----------|----------|-----------|----------|-----------|
| 1   | HLA-B*18:01 | EEILSKIY  | EEI-LSKIY | 0  | 0  | 0  | 3  | 1  | EEILSKIY  | PEPLIST  | 0.9466000 | 0.019    | <= SB     |
| 1   | HLA-B*18:01 | EEILSKIYH | EEILSKIYH | 0  | 0  | 0  | 0  | 0  | EEILSKIYH | PEPLIST  | 0.5734910 | 0.192    | <= SB     |
| 1   | HLA-B*18:01 | EILSKIYH  | -EILSKIYH | 0  | 0  | 0  | 0  | 1  | EILSKIYH  | PEPLIST  | 0.0086070 | 4.835    |           |
| 1   | HLA-B*18:01 | EEILSKIYK | EEILSKIYK | 0  | 0  | 0  | 0  | 0  | EEILSKIYK | PEPLIST  | 0.0535570 | 1.681    | <= WB     |

Protein PEPLIST. Allele HLA-B\*18:01. Number of high binders 2. Number of weak binders 1. Number of peptides 4

**Supplementary Figure S3. GCN4\_init peptides that overlap with ANK3 and have predicted binding to HLA-B18:01.** Results are shown for the MHC allele HLA-B\*18:01. The 'BindLevel' column shows NetMHCpan4.1 predicted binding strength as follows: 'SB' (strong binder), 'WB' (weak binder). The %Rank\_EL defines predicted strong binders (<0.5%) and weak binders (<2%). The SB sequence EEILSKIY would involve an amino acid insertion at position 3, the SB sequence EEILSKIYH does not require an insertion but involves two amino acid changes in ANK3 relative to the reference genome. The WB sequence EEILSKIYK could be produced by a single nucleotide change relative to the reference ANK3 sequence.

| Allele  | Population                                                                                                                                     | % of individuals<br>that have the allele | Allele<br>Frequency<br>(in_decimals)                                                       | Sample<br>Size |
|---------|------------------------------------------------------------------------------------------------------------------------------------------------|------------------------------------------|--------------------------------------------------------------------------------------------|----------------|
| B*18:01 |  Austria                                                      | 9.0                                      | 0.0500    | 200            |
| B*18:01 |  Azores Terceira Island                                       |                                          | 0.0390    | 130            |
| B*18:01 |  Belgium                                                      | 10.2                                     | 0.0510    | 99             |
| B*18:01 |  Croatia                                                      |                                          | 0.1130    | 150            |
| B*18:01 |  Croatia pop 4                                                |                                          | 0.0816    | 4,000          |
| B*18:01 |  Czech Republic                                               |                                          | 0.0750    | 106            |
| B*18:01 |  Czech Republic NMDR                                          |                                          | 0.0643    | 5,099          |
| B*18:01 |  England North West                                           | 9.1                                      | 0.0450    | 298            |
| B*18:01 |  Finland                                                      |                                          | 0.0780    | 91             |
| B*18:01 |  France French Bone Marrow Donor Registry                     |                                          | 0.0580    | 42,623         |
| B*18:01 |  France Southeast                                             | 8.5                                      | 0.0430    | 130            |
| B*18:01 |  Germany DKMS - Austria minority                              |                                          | 0.0459    | 1,698          |
| B*18:01 |  Germany DKMS - Bosnia and Herzegovina minority               |                                          | 0.0749    | 1,028          |
| B*18:01 |  Germany DKMS - China minority                                |                                          | 0.0047    | 1,282          |
| B*18:01 |  Germany DKMS - Croatia minority                              |                                          | 0.0848    | 2,057          |
| B*18:01 |  Germany DKMS - France minority                               |                                          | 0.0551    | 1,406          |
| B*18:01 |  Germany DKMS - German donors                                 |                                          | 0.0477    | 3,456,066      |
| B*18:01 |  Germany DKMS - Greece minority                               |                                          | 0.0940    | 1,894          |
| B*18:01 |  Germany DKMS - Italy minority                                |                                          | 0.1066    | 1,159          |
| B*18:01 |  Germany DKMS - Netherlands minority                        |                                          | 0.0415  | 1,374          |
| B*18:01 |  Germany DKMS - Portugal minority                           |                                          | 0.0492  | 1,176          |
| B*18:01 |  Germany DKMS - Romania minority                            |                                          | 0.0875  | 1,234          |
| B*18:01 |  Germany DKMS - Spain minority                              |                                          | 0.0678  | 1,107          |
| B*18:01 |  Germany DKMS - Turkey minority                             |                                          | 0.0587  | 4,856          |
| B*18:01 |  Germany DKMS - United Kingdom minority                     |                                          | 0.0358  | 1,043          |
| B*18:01 |  Germany pop 6                                              |                                          | 0.0473  | 8,862          |
| B*18:01 |  Germany pop 8                                              |                                          | 0.0505  | 39,689         |
| B*18:01 |  Greece pop 6                                               |                                          | 0.1580  | 242            |
| B*18:01 |  Ireland Northern                                           | 5.7                                      | 0.0290  | 1,000          |
| B*18:01 |  Ireland South                                              | 8.4                                      | 0.0420  | 250            |
| B*18:01 |  Italy North pop 3                                          | 33.3                                     | 0.1670  | 97             |
| B*18:01 |  Italy pop 5                                                |                                          | 0.0580  | 975            |
| B*18:01 |  Kosovo                                                     | 22.6                                     | 0.1331  | 124            |
| B*18:01 |  Netherlands Leiden                                         |                                          | 0.0330  | 1,305          |
| B*18:01 |  Poland                                                     |                                          | 0.0700  | 200            |
| B*18:01 |  Poland DKMS                                                |                                          | 0.0727  | 20,653         |
| B*18:01 |  Portugal Azores Terceira Island                            | 7.9                                      | 0.0395  | 130            |
| B*18:01 |  Romania                                                    | 21.3                                     | 0.1130  | 348            |
| B*18:01 |  Serbia pop 2                                               | 15.7                                     | 0.0780  | 102            |
| B*18:01 |  Spain (Catalunya, Navarra, Extremadura, Aragón, Cantabria, | 15.9                                     | 0.0835  | 4,335          |

**Supplementary Figure S4. Population frequencies of HLA-B\*18:01 in European populations.** The frequency of HLA-B\*18:01 is shown, covering up to 33.3% of individuals in some populations. Allele frequency values are expected to be approximately half of the proportion of individuals with the allele due to heterozygosity. Data is from the Allele Frequency Net Database (AFND) [48].

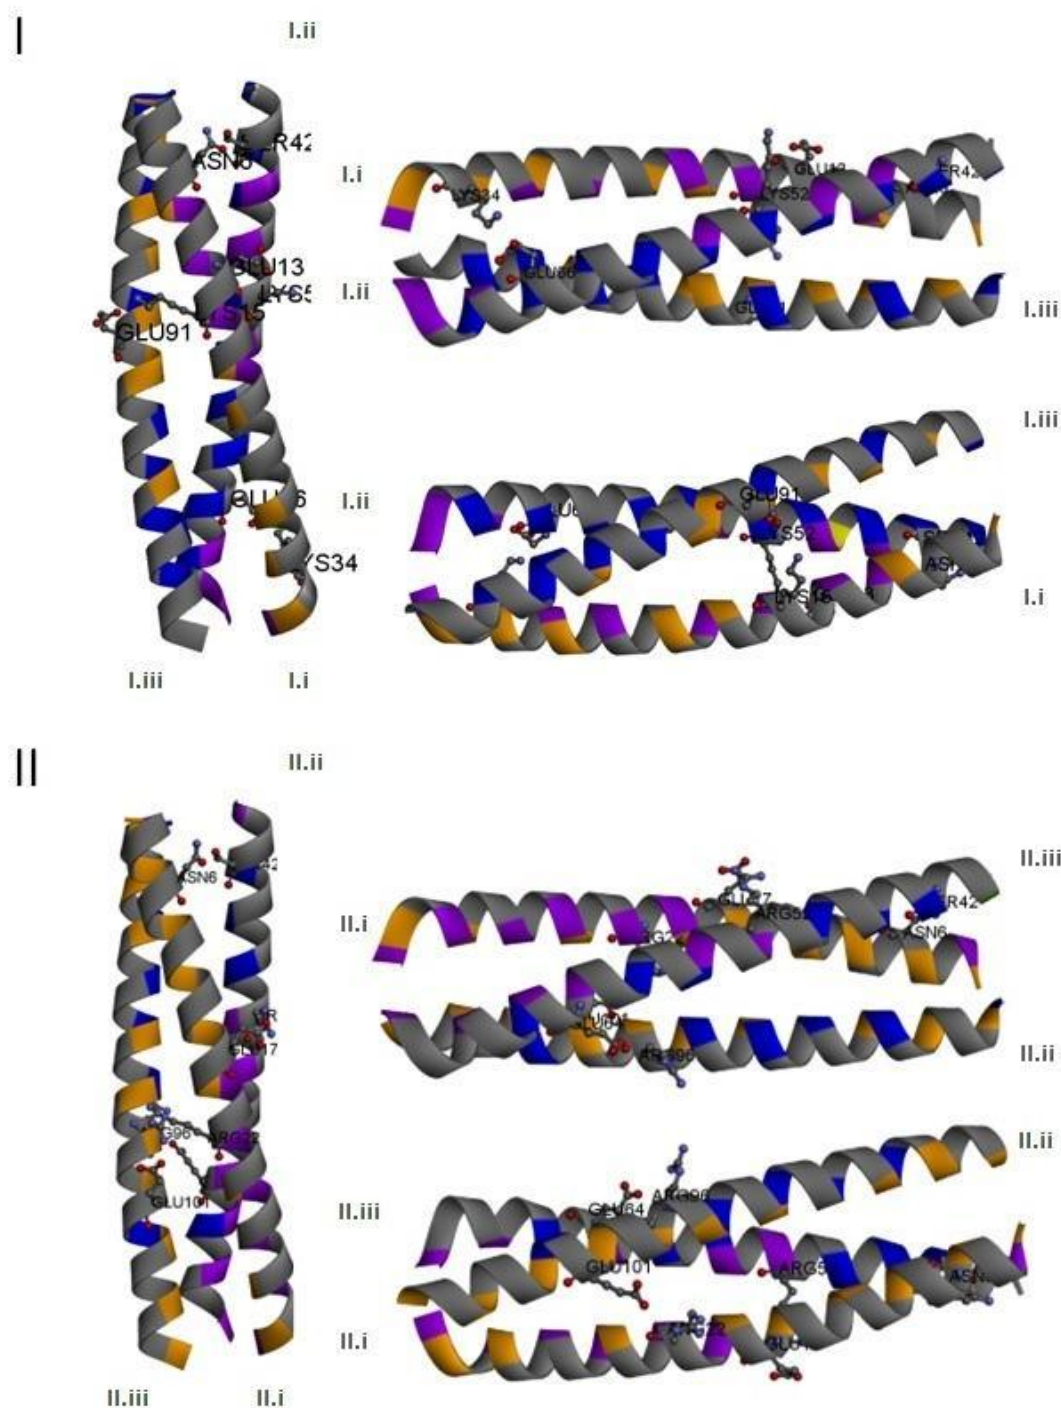

**Supplementary Figure S5. Structural models for GCN4\_init and GCN4\_QM, highlighting inter-helix interactions.** Homology models of the trimeric GCN4\_init (I, top) and GCN4\_QM (II, bottom) are shown. The template was the yeast GCN4 structure (PDB identifier: 1GCM). Helix colouring indicates regions of hydrophobic interactions for the pairs i-ii (purple), i-iii (orange) and ii-iii (blue); grey shows residues not involved in hydrophobic packing. Van der Waals radii are shown for residues participating in electrostatic and hydrogen bond interactions (CPK space-filling), which are also labelled in black text. Atoms are shown in standard colours (oxygen in red, nitrogen in blue, carbon in grey). Helix identifiers (I.i, I.ii etc.) are equivalent to those shown in main Figure 3. Notably, helices I.ii and I.iii (GCN4\_init) only have hydrophobic packing interactions, while helices II.ii and II.iii (GCN4\_QM) have an electrostatic interaction between Glu64 (II.ii) and Arg96 (II.iii).
